# Supplementary material for: Ceria-based oxide catalysts supported on metal–organic frameworks: selective oxidation of toluene to CO2 and the doped metal-activity relationship
Source: Royal Society of Chemistry journal article supplement (doi:10.1039/d2cy02161g), 2023-01-01
Supplement: d2cy02161g1.pdf [file d2cy02161g1.pdf]

1 **Ceria-based Oxide Catalysts Supported on Metal-organic**  
2 **Frameworks: The Selective Oxidation Toluene to CO<sub>2</sub> and Doped**  
3 **metals – Activity Relationship**

4 Xueyan Hou<sup>a</sup>, Ye Bian<sup>a</sup>, Lijian Jin<sup>a</sup>, Linjun Yang<sup>a\*</sup>

5 a. Key Laboratory of Energy Thermal Conversion and Control of Ministry of Education, School  
6 of Energy and Environment, Southeast University, Nanjing, 210096, Jiangsu, P. R. China.

7 *\*Corresponding author: Linjun Yang, Email: [101010340@seu.edu.cn](mailto:101010340@seu.edu.cn), Telephone number: +86*

8 025-52090800

---

## 9 1 Experimental section

### 10 1.1 Preparation of catalysts

11 First, 12 ml of aqueous cerium ammonium nitrate solution ( $0.533 \text{ mol}\cdot\text{L}^{-1}$ ) was  
12 poured into a precipitate formed by mixing 1.062 g terephthalic acid and 24 mL N, N-  
13 dimethylformamide (DMF). Then, an organic solvent is produced by stirring the  
14 previous solution for 30 minutes in a glass reactor. The organic solvents are heated for  
15 15 minutes at  $100^\circ\text{C}$  with stirring in an oil bath. After natural cooling, the pale-yellow  
16 precipitates are washed twice with DMF, and three times with acetone, then dried  
17 overnight in the air at  $70^\circ\text{C}$  to obtain UiO-66-Ce precursor.

18  $\text{CeMO}_x/\text{UiO-66-Ce}$  ( $M=\text{Cu, Co, Mn, Fe, Zr}$ ) precursors are prepared by applying the  
19 same method. 12 ml of aqueous cerium ammonium nitrate solution and other metals  
20 nitrate solution ( $0.533 \text{ mol}\cdot\text{L}^{-1}$ ) was poured into a precipitate formed by mixing 1.062  
21 g terephthalic acid and 24 mL N, N-dimethylformamide (DMF). Then, an organic  
22 solvent is produced by stirring the previous solution for 30 minutes in a glass reactor.  
23 The organic solvents are heated for 15 minutes at  $100^\circ\text{C}$  with stirring in an oil bath. The  
24 molar ratio of the obtained sample ( $\text{Ce}/M$ ) is 3/1.

25 All precursors are achieved by calcination at  $350^\circ\text{C}$  for 4 h in the air (heating rate of  
26  $2^\circ\text{C}/\text{min}$ ). Later, the collected samples are expressed as  $\text{CeO}_2/\text{U}$  and  $\text{CeM}/\text{U}$  ( $M=\text{Ce,}$   
27  $\text{Cu, Co, Mn, Fe, Zr}$ ).

### 28 1.2 Material characterizations

29 The crystalline structure of the samples was analyzed by X-ray diffraction (**XRD**)  
30 spectrometry with Rigaku Ultimate IV Powder X-Ray (Japan) Cu Ka Diffractometer  
31 Wavelength 1.5418Å Voltage 40KV Current 40mA, the spectra obtained from  $5^\circ$ - $30^\circ$   
32 at a scan speed of  $2^\circ\cdot\text{min}^{-1}$ .

33 A Mike ASAP2460 (USA) analyzer was used to test the Brunauer-Emmet-Teller  
34 (**BET**) at a temperature of 77 K.

35 The actual metal contents were determined using Inductively Coupled Plasma  
36 Mass spectrometry (**ICP-MS**) with a PerkinElmer NexION 300X spectrometer (USA).

---

37 Transmission electron microscopy (**TEM**) was performed on the FEI talos F200x  
38 G2 transmission electron microscope operated at an accelerating voltage of 80 kV.

39 The oxygen vacancy structure of UiO-66-Ce-M (M=Cu, Co, Mn, Fe, Zr) was  
40 measured by Electron Paramagnetic Resonance (**EPR**) using Bruker EMXPLUS  
41 (Germany), and the performance of 20 mg catalyst powder was analyzed at 30°C.  
42 Besides, UiO-66-Ce-Cu was also analyzed by EPR at 250 °C.

43 The hydrogen temperature programmed reduction (**H<sub>2</sub>-TPR**) and oxygen  
44 temperature programmed desorption (**O<sub>2</sub>-TPD**) measurements were conducted on  
45 FINSORB3010 (China). The hydrogen temperature programmed reduction (H<sub>2</sub>-TPR)  
46 corresponding samples (70 mg) placed in a quartz reactor was pre-heated in 5% H<sub>2</sub>/Ar  
47 flow from room temperature to 200 °C and held for 1 h (10 mL min<sup>-1</sup>), and then cooled  
48 to room temperature. The catalysts were heated from room temperature to 800 °C with  
49 a constant rate of 10 °C min<sup>-1</sup> under a gas flow (5% H<sub>2</sub>/Ar, 10 mL min<sup>-1</sup>).

50 The temperature-programmed desorption of O<sub>2</sub> (**O<sub>2</sub>-TPD**) with 50 mg catalysts was  
51 pre-heated in 5% O<sub>2</sub>/He flow from room temperature to 200 °C and held for 1 h (10 mL  
52 min<sup>-1</sup>), and then cooled to room temperature. The catalysts were heated from room  
53 temperature to 800 °C at 10 °C min<sup>-1</sup> in pure He (10 mL min<sup>-1</sup>).

54 Thermo Fisher Nexsa (USA) electronic spectrometer was used for X-ray  
55 photoelectron spectroscopy (**XPS**), which was corrected with C 1s = 284.8 eV.

56 **Raman** was tested by Invia Reflex LabRam HR Evolution (UK) with the Laser  
57 wavelength 532nm.

58 **FTIR** spectra were measured on a Nicolet 6700 spectroscopy using an MCT detector.  
59 The spectra were measured in the range from 4000 to 500 cm<sup>-1</sup> with a resolution of 4  
60 cm<sup>-1</sup> and 32 scans.

61 **In situ DRIFT** (diffuse reflectance infrared Fourier transform) spectra of Toluene/O<sub>2</sub>  
62 adsorption was measured by Nicolet 6700 spectroscopy (Thermo Fisher Scientific,  
63 USA), and the background was collected at the required temperature). The catalyst (20  
64 mg) was put into a sample cup and set inside a DRIFT cell fitted with a ZnSe window.

---

65 In a typical experiment, the powder samples were pretreated in pure N<sub>2</sub> (100 mL min<sup>-1</sup>)  
66 at 350 °C for 1 h to remove the residuals. After cooling down to 30 °C, a background  
67 spectrum was collected at 4 cm<sup>-1</sup> resolution for 32 scans in N<sub>2</sub> atmosphere. Then, the  
68 reactant gas (500 ppm toluene/N<sub>2</sub> or toluene/Air) with 100 mL min<sup>-1</sup> was continuously  
69 introduced into the in-situ reaction chamber. The DRIFTS spectra (4000–900 cm<sup>-1</sup>)  
70 were collected and continuously recorded for 3 h to realize the adsorption equilibrium  
71 at different temperatures (30, 100, 150, and 200°C).

### 72 **1.3 Catalytic activity measurements**

73 The toluene oxidation performance of the prepared catalysts was examined in a  
74 fixed-bed tubular quartz reactor (with a temperature-regulated electric furnace) in the  
75 temperature range of 100 - 300°C, with the temperature measured by a thermocouple  
76 placed in the middle. At a weight-hourly space velocity (WHSV) of 60,000 ml·g<sup>-1</sup>·h<sup>-1</sup>,  
77 the total flow rate of the experimental atmosphere (containing 500 ppm toluene, 21%  
78 O<sub>2</sub> and 79% N<sub>2</sub>) was controlled at 100 mL·min<sup>-1</sup> through a reactor by Teflon pipe. In a  
79 quartz tube reactor, 100 mg of catalyst powder (40 -60 mesh) was filled (outer diameter  
80 6 mm, inside diameter 4 mm). As the reaction proceeded, the effluent gas was measured  
81 by a flame gas chromatograph (GC-9860-5CNJ, China) with a flame ionization detector  
82 (FID) to record continuously. To study the effect of water vapor on the catalytic activity,  
83 the on-stream toluene oxidation experiment was carried out in the presence and absence  
84 of 10.0 vol.% water vapor obtained by bubbling.

85 2 Structure and Texture of Catalysts

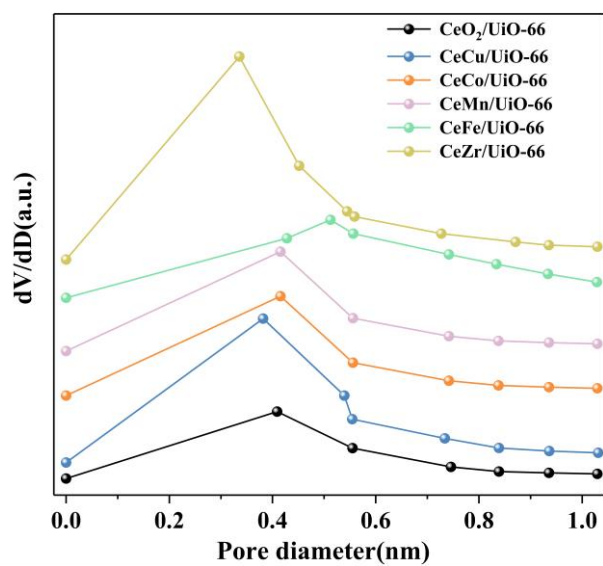

86

Figure S1. Microporous pore size distribution derived from the desorption branch of the isotherms.

87

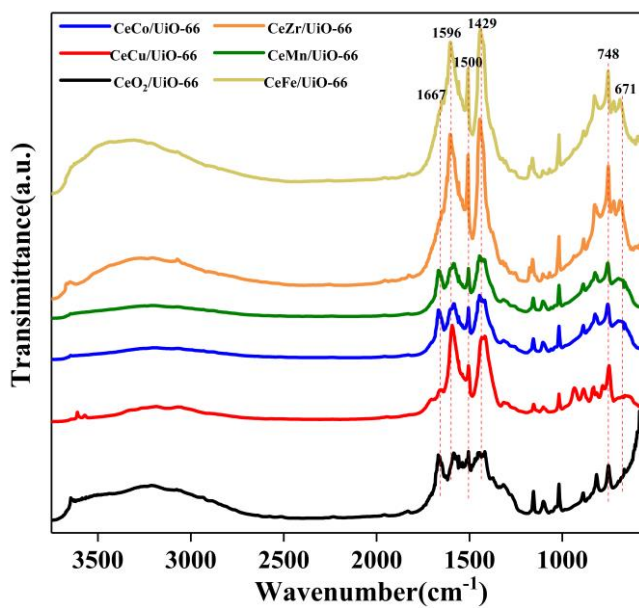

88

89

Figure S2. The infrared spectrum of CeMO<sub>x</sub>/UiO-66

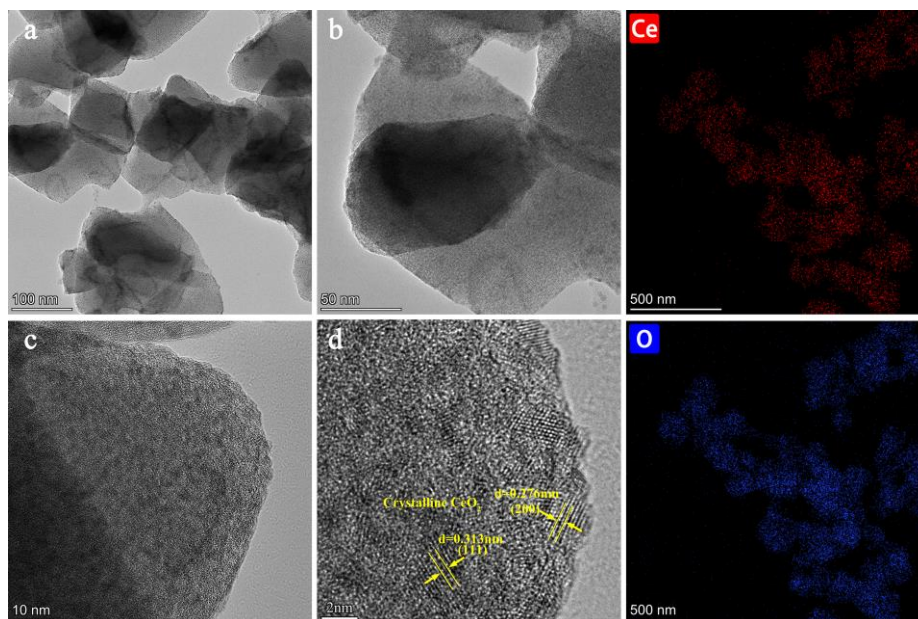

90

91 Figure S3. TEM images of CeO<sub>2</sub>/UiO-66 at (a-b) low resolution and (c) high resolution. (d) Enlarged high-  
 92 resolution images taken from the selected areas indicated by rectangles in (c).and EDS elemental maps of Ce,  
 93 O in the right, respectively

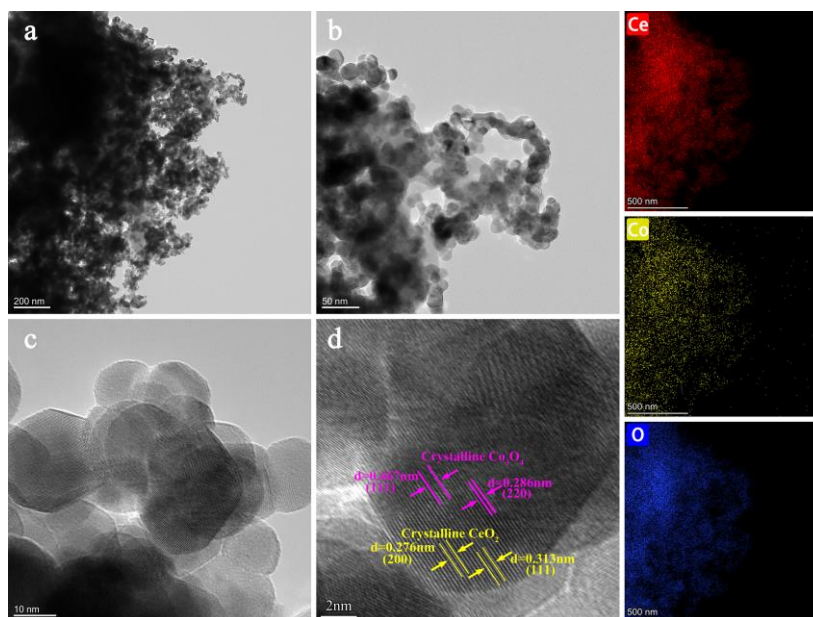

94

95 Figure S4 TEM images of CeCo/UiO-66 at (a-b) low resolution and (c) high resolution. (d) Enlarged high-  
 96 resolution images taken from the selected areas indicated by rectangles in (c).and EDS elemental maps of Ce,  
 97 Co, and O in the right, respectively

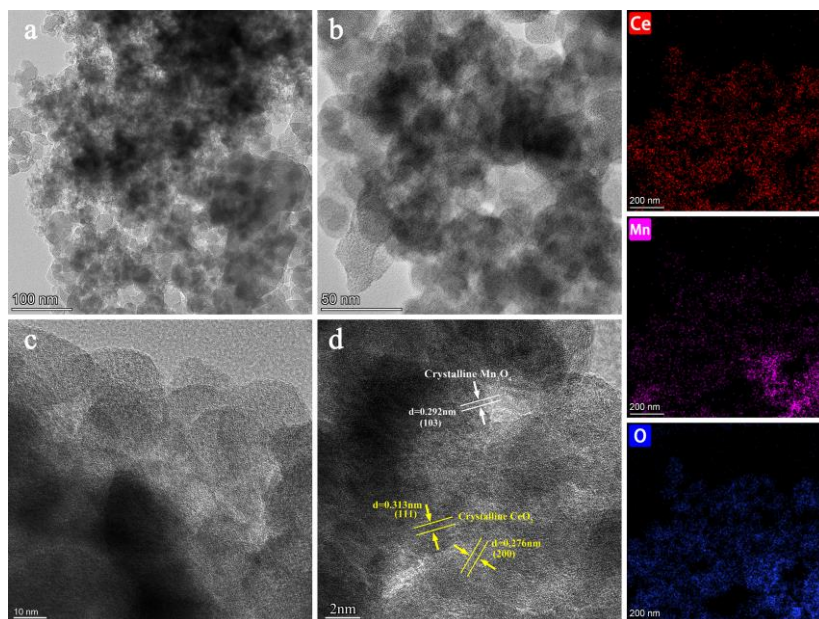

98

99 **Figure S5** TEM images of CeMn/UiO-66 at (a-b) low resolution and (c) high resolution. (d) Enlarged high-  
 100 resolution images taken from the selected areas indicated by rectangles in (c).and EDS elemental maps of Ce,  
 101 Mn, and O in the right, respectively

102

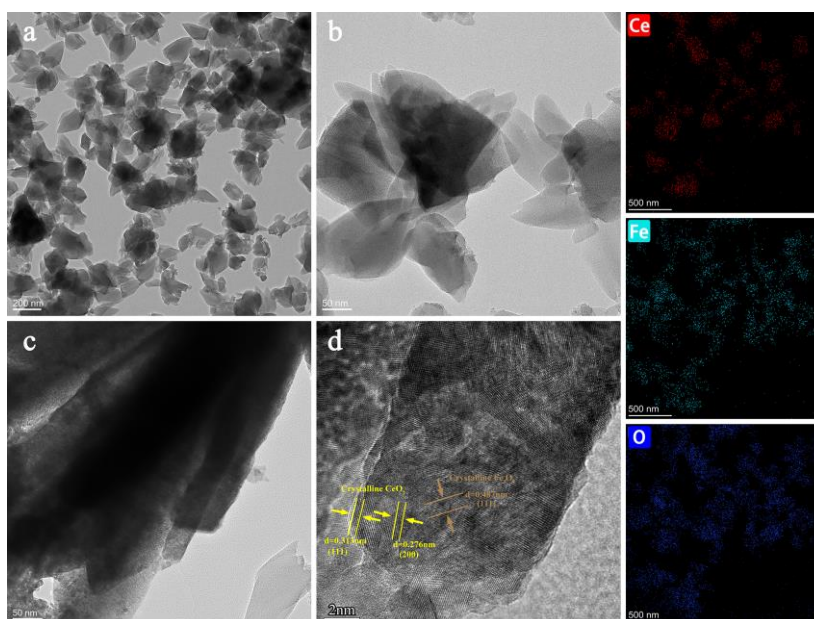

103

104 **Figure S6** TEM images of CeFe/UiO-66 at (a-b) low resolution and (c) high resolution. (d) Enlarged high-  
 105 resolution images taken from the selected areas indicated by rectangles in (c).and EDS elemental maps of Ce,  
 106 Fe, and O in the right, respectively

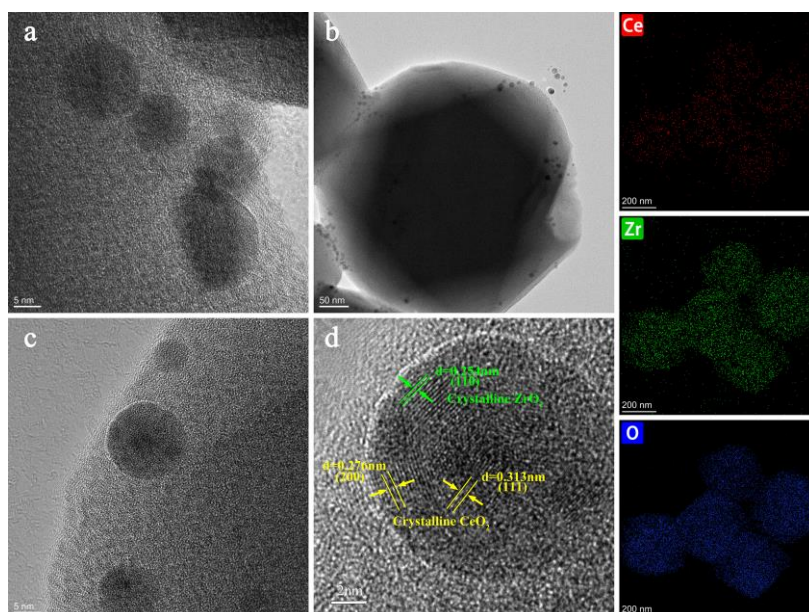

107

108

109

110

Figure S7 TEM images of CeZr/Uio-66 at (a-b) low resolution and (c) high resolution. (d) Enlarged high-resolution images taken from the selected areas indicated by rectangles in (c).and EDS elemental maps of Ce, Zr, and O in the right, respectively

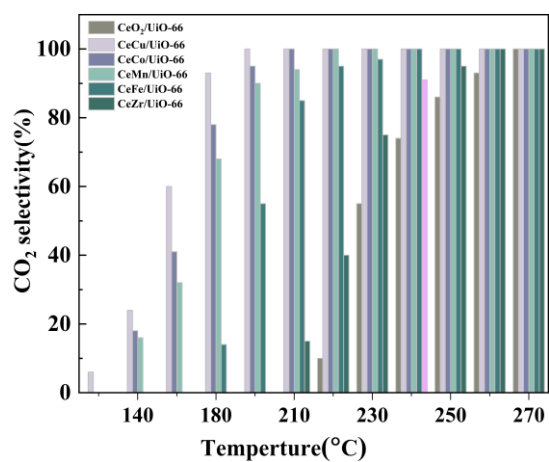

Figure S8 CO<sub>2</sub> selectivity of the samples



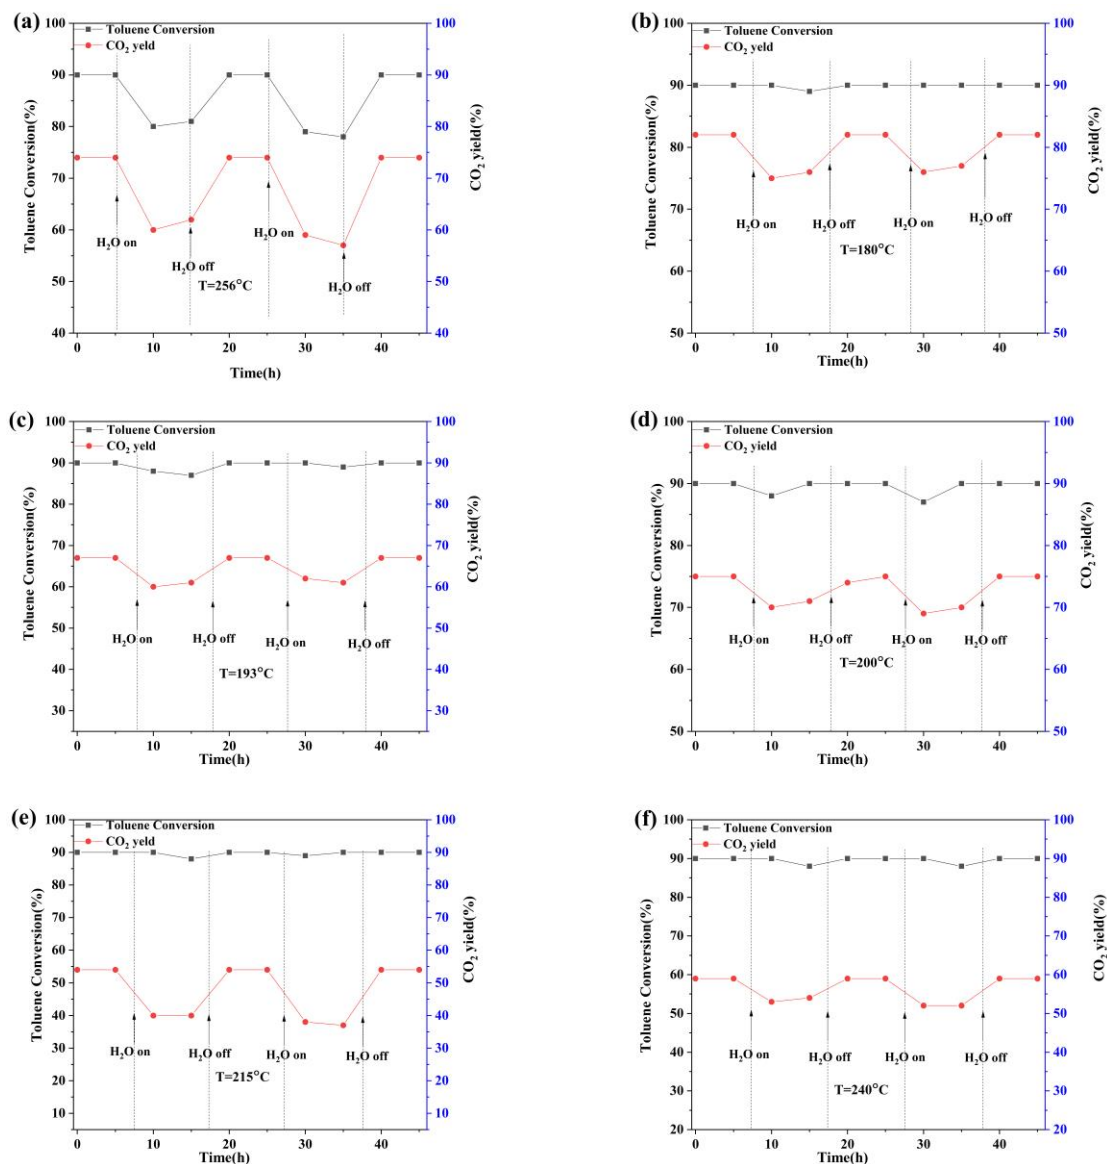

111 Figure S9. The effect of water vapor on catalytic oxidation at T90 over: (a) CeO<sub>2</sub>/UiO-66, (b) CeCu/UiO-  
 112 66 (c) CeCo/UiO-66 (d) CeMn/UiO-66 (e) CeFe/UiO-66 (f) CeZr/UiO-66 at WHSV = 60,000 mL·g<sub>cat</sub><sup>-1</sup>·h<sup>-1</sup>

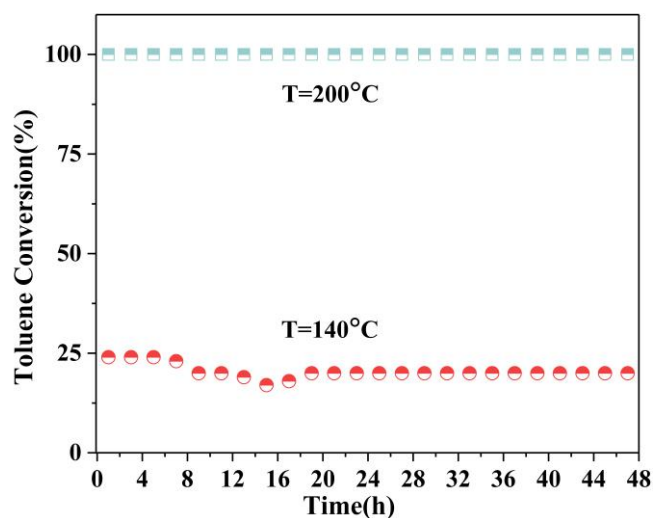

Figure S10. Thermal stability of CeCu/Uio-66. Reaction conditions:500 ppm toluene balanced air, WHSV = 60,000 mL·g<sub>cat</sub><sup>-1</sup>·h<sup>-1</sup>

Table S1 The percentage of surface element valence and acidity for CeMOx/Uio-66 samples.

| Samples                  | Ce <sup>3+</sup><br>(%) | Cu <sup>2+</sup><br>(%) | Co <sup>3+</sup><br>(%) | Mn <sup>4+</sup><br>(%) | Fe <sup>3+</sup><br>(%) | Zr <sup>4+</sup><br>(%) | O <sub>latt</sub><br>(%) | O <sub>ads</sub><br>(%) | Weak acid (%) |
|--------------------------|-------------------------|-------------------------|-------------------------|-------------------------|-------------------------|-------------------------|--------------------------|-------------------------|---------------|
| CeO <sub>2</sub> /Uio-66 | 18.11                   |                         |                         |                         |                         |                         | 19.64                    | 56.96                   | 53.11         |
| CeCu/Uio-66              | 55.87                   | 77.46                   |                         |                         |                         |                         | 73.42                    | 17.18                   | 79.28         |
| CeCo/Uio-66              | 47.78                   |                         | 52.18                   |                         |                         |                         | 54.13                    | 24.67                   | 71.73         |
| CeMn/Uio-66              | 33.85                   |                         |                         | 44.41                   |                         |                         | 48.65                    | 31.85                   | 62.76         |
| CeFe/Uio-66              | 25.76                   |                         |                         |                         | 62.28                   |                         | 32.19                    | 47.18                   | 59.68         |
| CeZr/Uio-66              | 21.02                   |                         |                         |                         |                         | 100                     | 27.66                    | 47.54                   | 57.49         |
